# Supplementary material for: Predatory Dogs as Drivers of Social Behavior Changes in the Central Himalayan Langur (Semnopithecus schistaceus) in Agro-forest Landscapes
Source: Preprints.org preprint supplement (doi:10.20944/preprints202404.1705.v1), 2024-04-26
Supplement: Supplementary file 1 [file supplementary]

**Supplementary Table 1.** Classification of open forests within the S Group territory (See Figure 1).

| **Location Name** | **Description** |
| --- | --- |
| **Gweer Alnus Patch** | Situated along the river in the lower portion of Gweer Village, this location has a small number of *Alnus nepalensis* trees, which provide the only canopy in the region. This area is surrounded by the human settlements and agricultural land. |
| **Gweer Prunus Patch** | The eastern section of the S Group territory is situated within Gweer Village. Characterized by sparse tree coverage, with only 4-6 *Prunus cerasoides* trees providing connectivity, this area is surrounded by the human settlements and agricultural land. |
| **Kunkuli School** | Situated at the southwest corner of the S Group territory, this open area is predominantly occupied by human settlements. Despite the sparse presence of trees, including *Prunus cerasoides*, *Celtis australis*, and *Grewia optiva* around the village houses, it remains highly preferred by the langurs. |
| **Kunkuli Agriculture Land** | This area encompasses agricultural fields in Kunkuli village and dominated primarily by *Celtis australis, Ficus virens,* and *Grewia optiva* trees planted along the edges of the agricultural land. |
| **Mandal Shivalay** | The western part of the S Group territory has open agricultural fields on one side and a river on the other. Alongside the riverbank, a row of *Prunus cerasoides* trees stands prominently, serving as the primary attraction for the langurs. |
| **Siroli Bridge** | This area includes patches of *Quercus leucotrichophora*, encircling the village of Siroli. It is also characterized by human settlements and agricultural fields. |
| **Siroli Agricultural Land** | This area encompasses agricultural fields in Siroli village and dominated primarily by *Celtis australis* and *Grewia optiva* trees planted along the edges of the agricultural land. |

**Supplementary Table 2**. Classification of dense forests within the S Group Territory (See figure 1).

| **Location Name** | **Description** |
| --- | --- |
| **Forest Chowki** | The dense *Quercus leucotrichophora* forest area which is the central point of the S Group territory. While one side extends into continuous forest, the other three sides are bordered by human settlements and agricultural land. |
| **Gondi Cliff** | This area is an extrema northwestern part of the S Group territory situated in the Gondi village area. This landscape is dominated by the *Quercus leucotrichophora* forest. |
| **Kunkuli Kaula Patch** | Located to the north of Kunkuli village and running parallel to the national highway, it's a dense forested area dominated by *Daphniphyllum himalense*. |
| **Kunkuli Oak Patch** | The largest contiguous dense forest dominated by *Quercus leucotrichophora* within the S Group territory stretches from the southern edge of their territory all the way to Kunkuli Village. |
| **Kunkuli Shivalay** | It comprises dense *Quercus leucotrichophora* forests, situated in the southeastern region of the S Group territory. These forests are connected to the Shiva temple in Kunkuli village and stretch all the way to Makroli village. Top of FormBottom of Form |
| **Siroli Road Oak Patch** | This is the northern part of the S Group territory lies in the Siroli Village. This area is dominated by the dense *Quercus leucotrichophora* continues forest. |
| **Siroli Cliff** | This area lies at the northernmost edge of the S Group territory and dominated by dense *Quercus leucotrichophora*. |
